# Supplementary material for: A low cost Zn2+/I− redox active electrolyte for a high energy and long cycle-life zinc hybrid battery–capacitor
Source: Royal Society of Chemistry journal article supplement (doi:10.1039/d3ta03912a), 2023-01-01
Supplement: d3ta03912a1.pdf [file d3ta03912a1.pdf]

## Supporting Information

### **A low cost $\text{Zn}^{2+}/\text{I}^-$ redox active electrolyte for a high energy and long cycle-life zinc hybrid battery-capacitor**

Balamurugan Selvaraj, Balaji Sambandam, Sungjin Kim, Vinod Mathew, Sehong Seo, Moonsu Song and Jackook Kim\*

Department of Materials Science and Engineering, Chonnam National University, 300 Yongbong-dong, Bukgu, Gwangju, 500-757, South Korea.

---

\*Corresponding author: E-mail: [jackook@chonnam.ac.kr](mailto:jackook@chonnam.ac.kr); Fax: +82-62-530-1699; Tel: +82-62-530-1703

## **Experimental**

### **Materials**

Gelatin, potassium hydroxide (KOH), potassium iodide (KI), zinc iodide ( $\text{ZnI}_2$ ), zinc sulfate monohydrate ( $\text{ZnSO}_4 \cdot \text{H}_2\text{O}$ ), N-methyl-2-pyrrolidone (NMP), and poly acrylic acid (PAA) were purchased from Sigma Aldrich chemicals and used without any purification.

### **Synthesis of porous carbon**

The precursor gelatin was heated at 650 °C in a highly equipped quartz tubular furnace under Argon atmosphere and maintained for 1 h to complete the carbonization process. Subsequently, the obtained carbon and activation agent KOH were mixed in 1:3 weight ratio, heated up to 750 °C at an increasing rate of 10 °C/min and the activation was maintained for 1 h under Ar condition. After activation, the dark black powder was washed thoroughly with HCl and distilled water to eliminate the residual alkali completely and dried in a hot air oven at 100°C for 12 h to obtain the final activated porous carbon (PC) product.

### **Instrumentation**

Powder X-ray diffraction (PXRD) for synthesized porous carbon material was analyzed using a Shimadzu X-ray diffractometer (Cu  $K\alpha$  radiation,  $k = 1.5406 \text{ \AA}$ ). The porous morphology of the prepared PC was determined by the instruments, S-4700 Hitachi (field emission scanning electron microscopy, FE-SEM) and Philips Tecnai F20 at 200 kV (field emission transmission electron microscopy, FE-TEM), KBSI, Chonnam National University, respectively. Elemental analysis was conducted on a EDX analyzer (EMAX Energy EX-200, Horiba) attached to a F20 microscope. The specific surface area and pore parameters were acquired by  $\text{N}_2$  adsorption/desorption studies using a Micromeritics ASAP2010 instrument based on the Brunauer–Emmett–Teller (BET,) method. The graphitization degree of PC was detected by Raman spectra using a JASCO Raman spectrometer, NRS-5100 with a 532 nm laser line. The elemental oxidation states in PC were obtained by X-ray photoelectron spectroscopy (XPS, Thermo VG Scientific instrument, Multilab 2000) with Al  $K\alpha$  as the X-ray source.

An active material (PC), conducting carbon (super P), and binder poly acrylic acid (PAA) in the weight ratio of 80:10:10 in NMP were mixed as a viscous slurry to act as the cathode. The cathode slurry was then uniformly coated on a stainless-steel foil (current

collector) by doctor blade method and dried overnight in a vacuum oven at 100 °C. It was then hot pressed over stainless-steel rollers at 100 °C and punched into circular discs. The loaded active material was found to be 2.7-3.2 mg/cm<sup>2</sup>. A 2032-type coin cell was made-up by a cathode, a separator (Glass fiber) and anode (zinc foil). An aqueous solution of 1 M ZnSO<sub>4</sub>, 2 M ZnSO<sub>4</sub>, 1 M ZnSO<sub>4</sub> + 0.04 M KI, 2 M ZnSO<sub>4</sub> + 0.04 M KI, 1 M ZnSO<sub>4</sub> + 0.08 M KI, 2 M ZnSO<sub>4</sub> + 0.08 M KI, 1 M ZnSO<sub>4</sub> + 0.16 M KI, 2 M ZnSO<sub>4</sub> + 0.16 M KI and 1 M ZnSO<sub>4</sub> + 0.08 M ZnI<sub>2</sub> were used as electrolytes respectively. The pH of the electrolytes employed varied from ~ 4.96 to 5.45 (**Fig. S1**). The price of the KI and ZnI<sub>2</sub> additives are given in the **Table S2**. Electrochemical analysis of the assembled cells was examined using a multi-channel BTS 2004H battery tester (Nagano Keiki Co. Ltd., Tokyo, Japan) in the 0.2-1.8 (vs. Zn/Zn<sup>2+</sup>) voltage range. Moreover, cyclic voltammetry (CV) and Electrochemical impedance spectrum (EIS) experiments were conducted in a Biologic VSP potentiostat instrument.

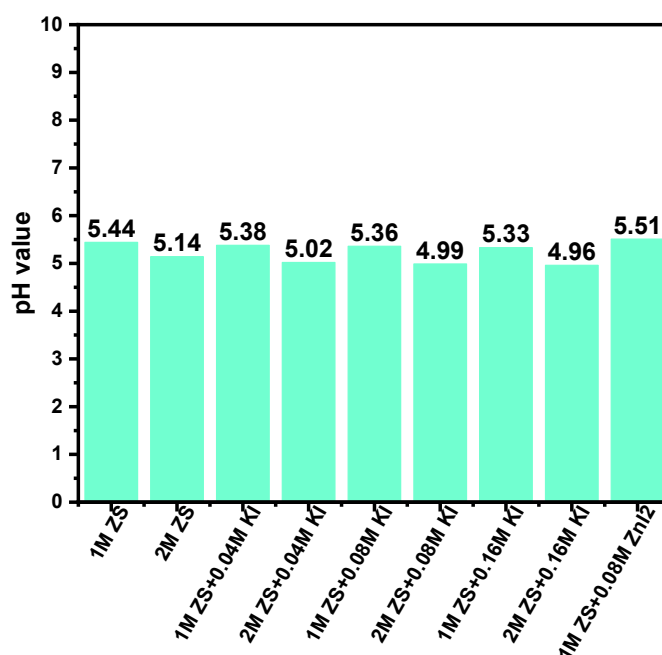

**Fig. S1** pH values of the aqueous zinc electrolytes.

**Table S1** Elemental analysis of PC.

| Sample Name | Nitrogen | Carbon | Hydrogen |
|-------------|----------|--------|----------|
| PC          | 1.112    | 54.515 | 4.484    |

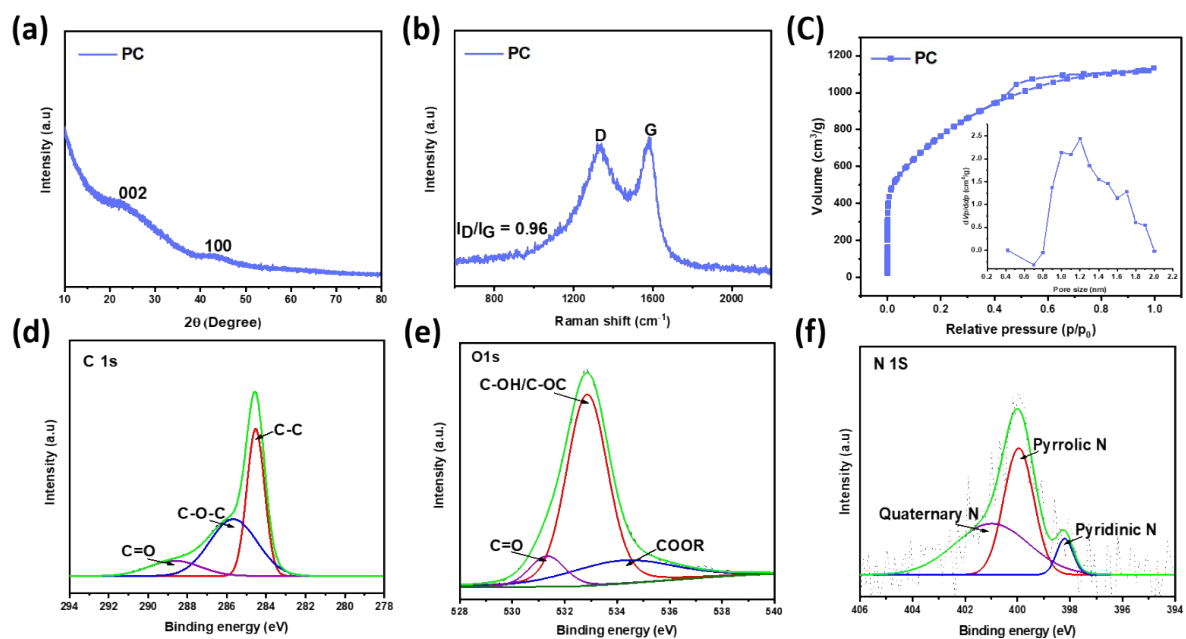

**Fig. S2** (a) XRD pattern, (b) Raman spectrum, (c) Nitrogen adsorption–desorption isotherms with pore-size distribution plot (inset), (d) XPS C1s, (e) XPS O1s, and (f) XPS N1s spectra of PC cathode.

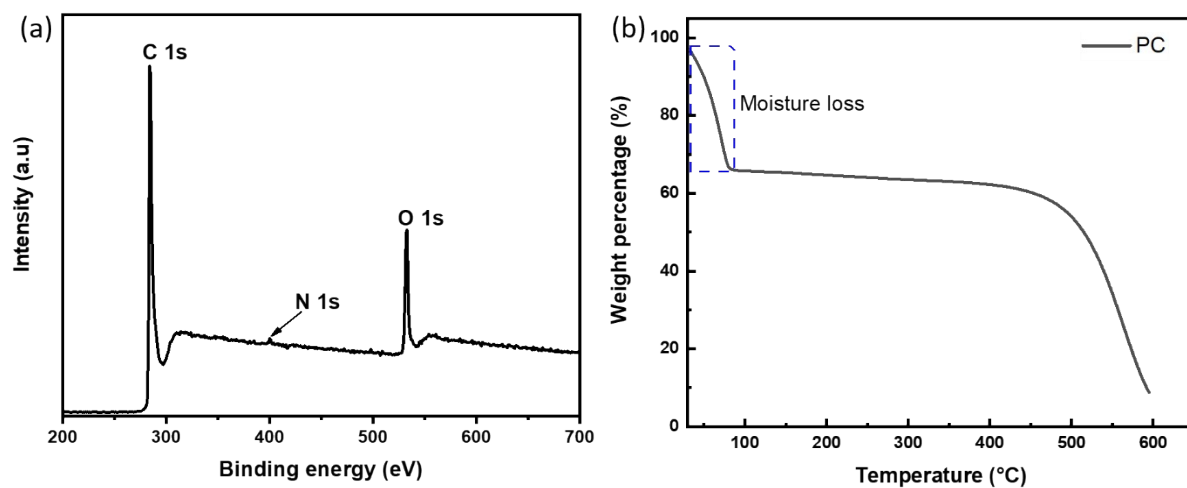

**Fig. S3** (a) XPS survey spectrum and (b) TGA of PC.

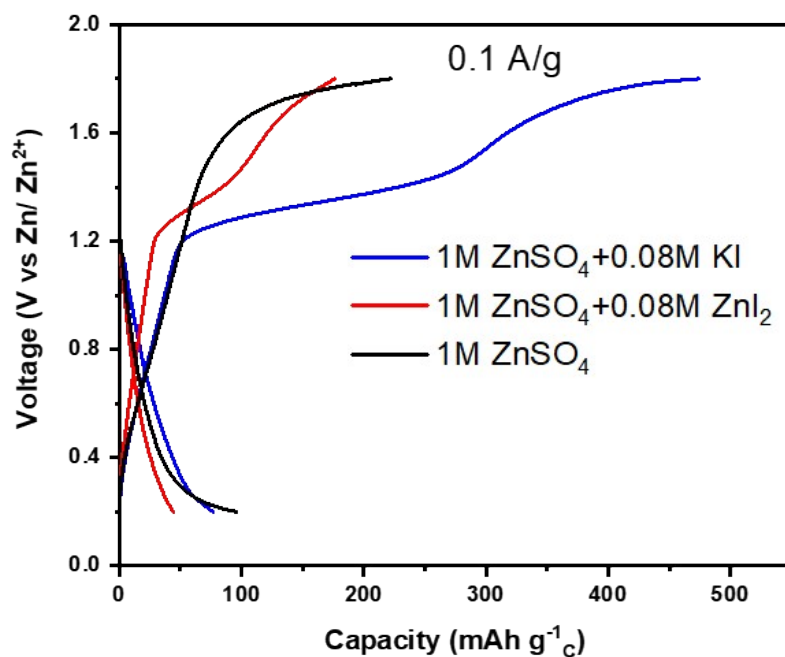

**Fig. S4** Comparative initial discharge/charge curves of fabricated ZHC cell with electrolytes 1M ZnSO<sub>4</sub>, and AZHBC cells with electrolytes 1M ZnSO<sub>4</sub> + 0.08 M ZnI<sub>2</sub>, and 1M ZnSO<sub>4</sub> + 0.08 M KI at a current density of 0.1 A g<sup>-1</sup>.

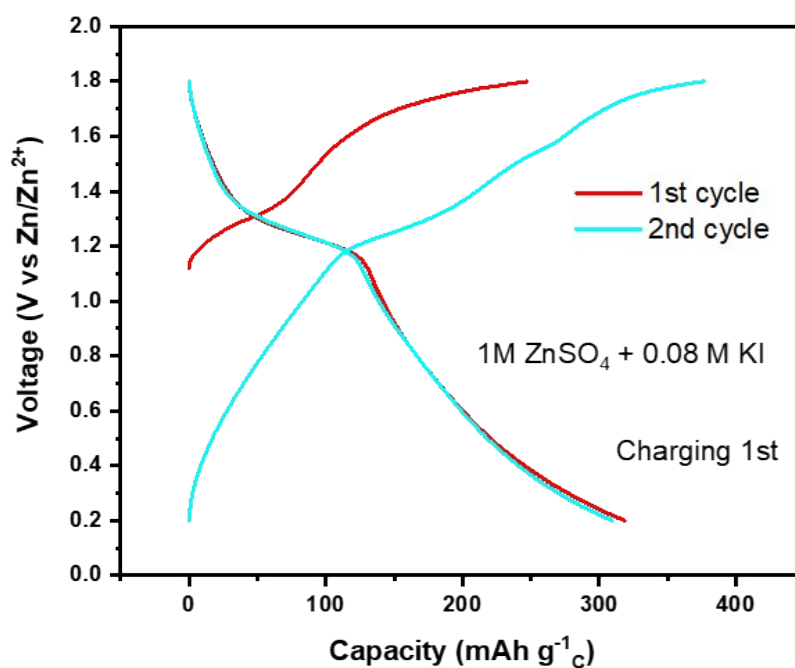

**Fig. S5** Initial charge/discharge curves of fabricated AZHBC cells with electrolytes 1M ZnSO<sub>4</sub> + 0.08 M KI at a current density of 0.1 A g<sup>-1</sup>.

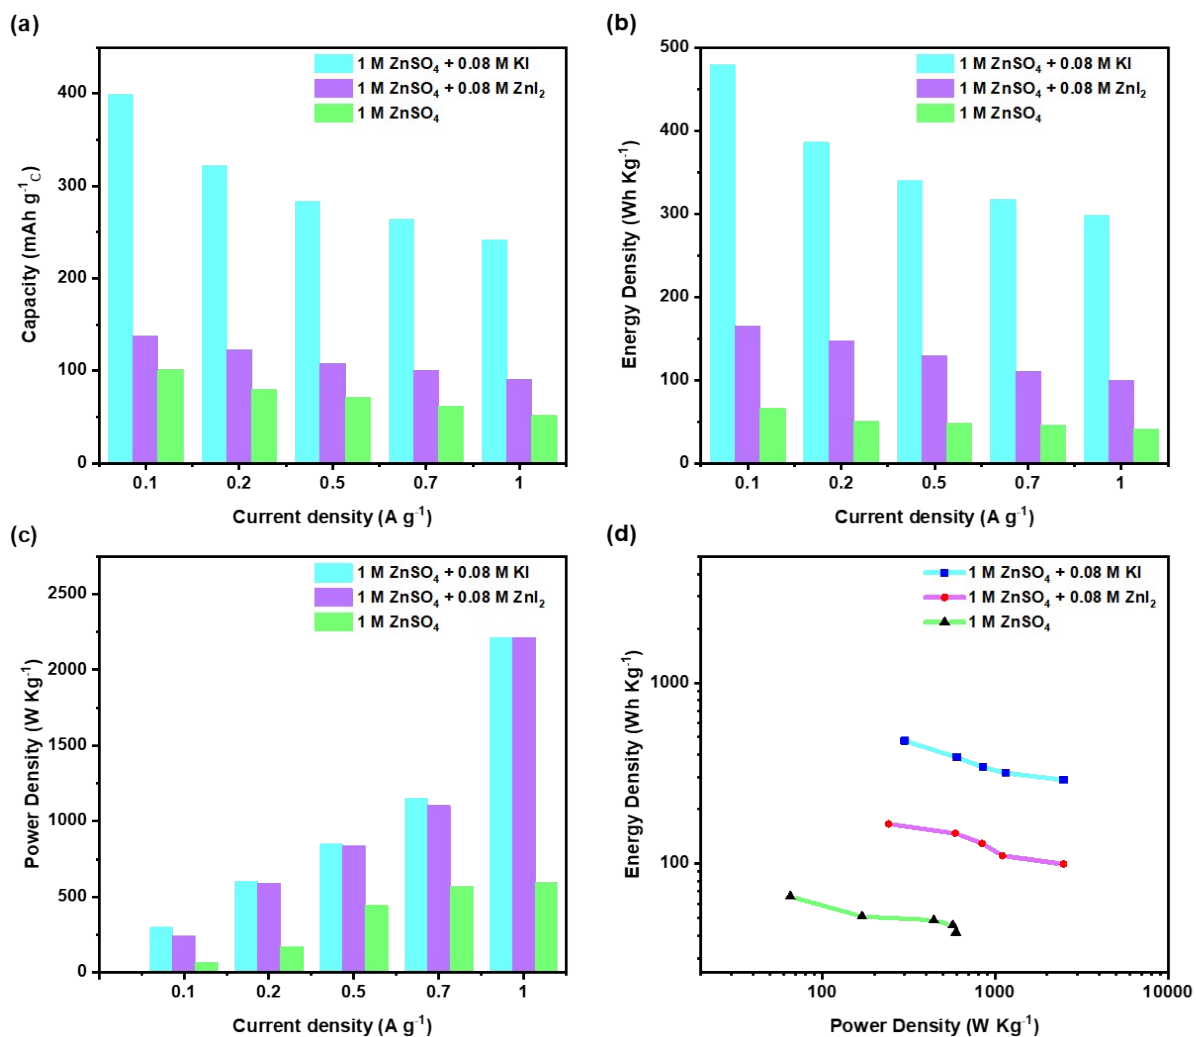

**Fig. S6** (a) Specific capacities, (b) Energy densities, (c) Power densities at current densities from 0.1 to 1 A g<sup>-1</sup> and (d) Rangone plots of ZHC cells with electrolyte 1M ZnSO<sub>4</sub>, and AZHBC cells with electrolytes 1M ZnSO<sub>4</sub> + 0.08 M ZnI<sub>2</sub>, and 1M ZnSO<sub>4</sub> + 0.08 M KI respectively.

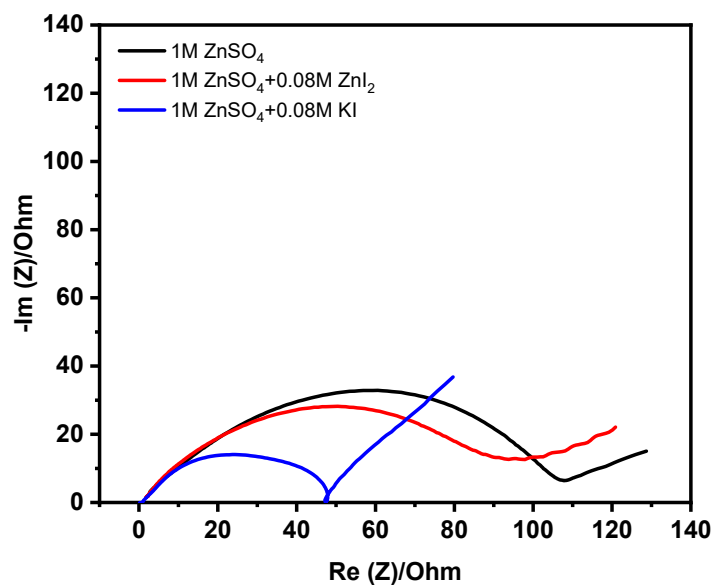

**Fig. S7** Comparative EIS curves of fabricated ZHC cells with electrolytes 1M  $\text{ZnSO}_4$ , and AZHBC cells with electrolytes 1M  $\text{ZnSO}_4 + 0.08 \text{ M ZnI}_2$ , and 1M  $\text{ZnSO}_4 + 0.08 \text{ M KI}$ .

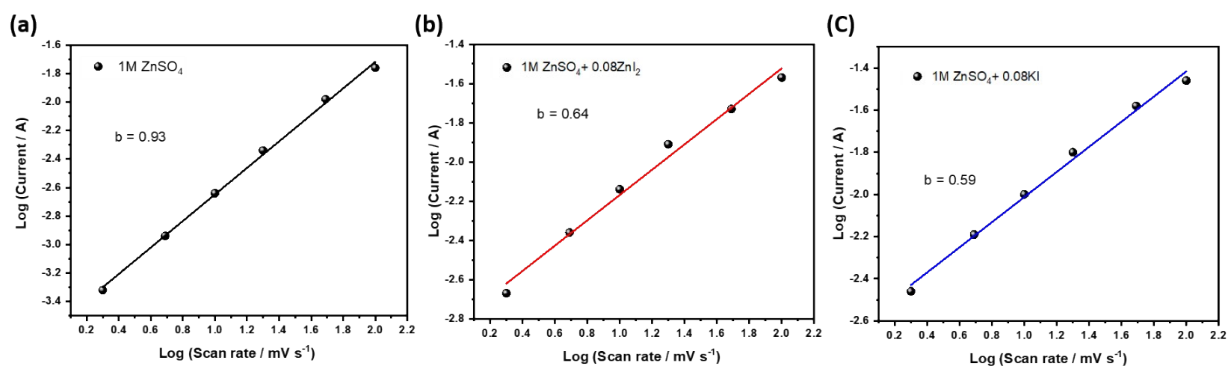

**Fig. S8** Linear fit of  $\log(v)$  and  $\log(i)$  of fabricated ZHC cells with electrolytes (a) 1M  $\text{ZnSO}_4$ , and AZHBC cells with electrolytes (b) 1M  $\text{ZnSO}_4 + 0.08 \text{ M ZnI}_2$ , and (c) 1M  $\text{ZnSO}_4 + 0.08 \text{ M KI}$ .

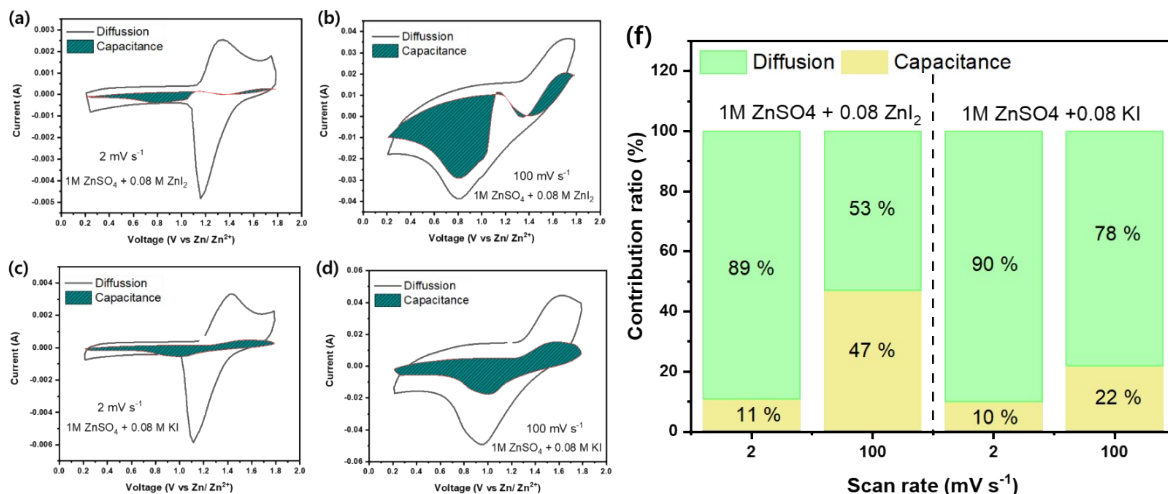

**Fig. S9** Diffusion and capacitance contribution plots of AZHBC cells with electrolytes (a & b) 1M ZnSO<sub>4</sub> + 0.08 M ZnI<sub>2</sub>, (c & d) 1M ZnSO<sub>4</sub> + 0.08 M KI and (f) bar diagram of contribution ratios at different scan rates.

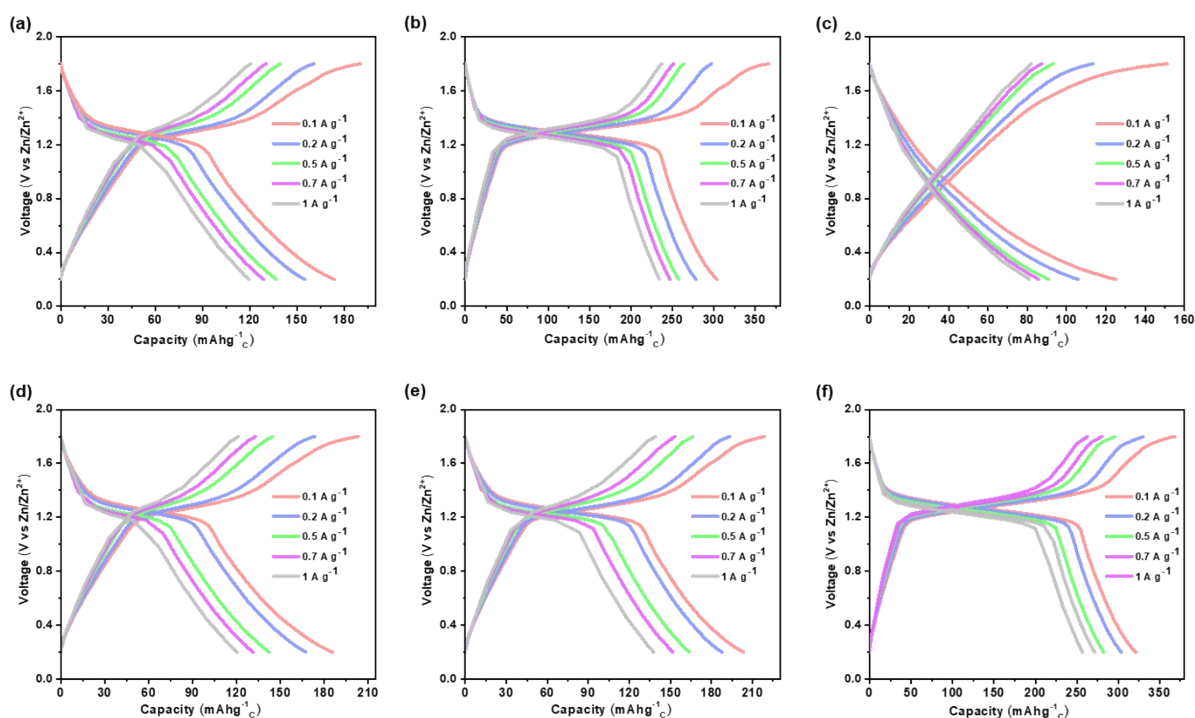

**Fig. S10** GCD curves of fabricated AZHBC cells at different current densities (0.1, 0.2, 0.5, 0.7, and 1 A g<sup>-1</sup>) in (a) 1 M ZnSO<sub>4</sub> + 0.04 M KI, (b) 1 M ZnSO<sub>4</sub> + 0.16 M KI, (c) 2 M ZnSO<sub>4</sub>, (d) 2 M ZnSO<sub>4</sub> + 0.04 M KI, (e) 2 M ZnSO<sub>4</sub> + 0.08 M KI, and (f) 2 M ZnSO<sub>4</sub> + 0.16 M KI electrolyte solutions, respectively.

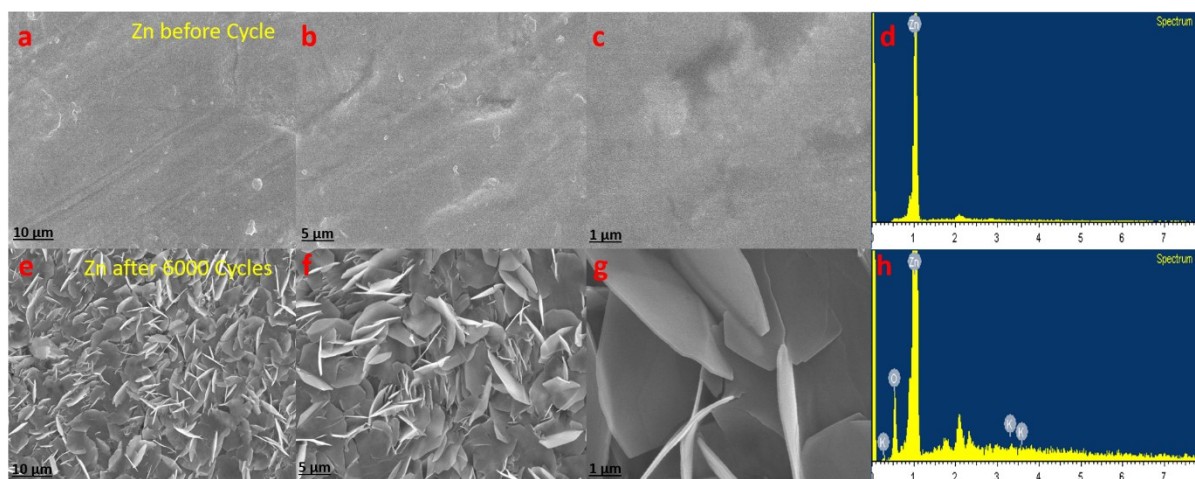

**Fig. S11** SEM images and EDAX of Zinc anode (a, b, c & d) before cycle and (e, f, g & h) after 6000 cycles in 1 M  $\text{ZnSO}_4$  + 0.08 M KI.

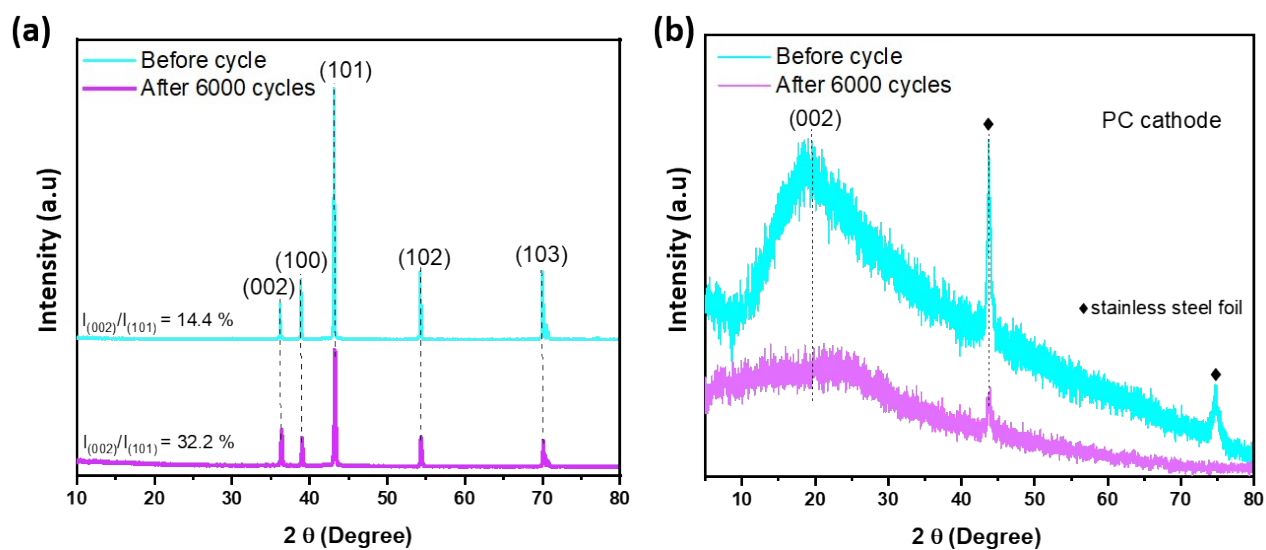

**Fig. S12** XRD of (a) Zinc anodes, (b) PC cathodes before and after cycling.

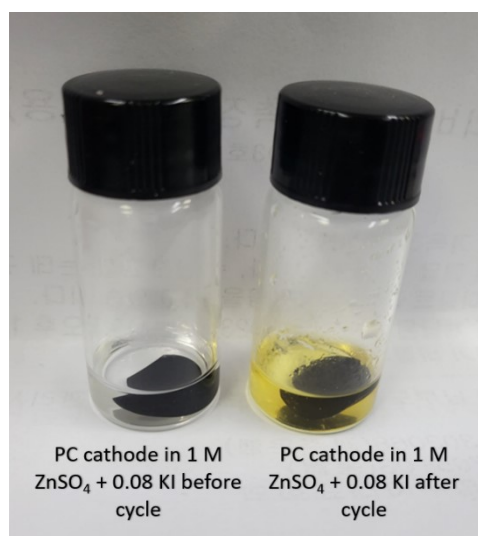

**Fig. S13** Color change of electrodes immersed in fresh KI electrolyte (a) before and (b) after complete charging to confirm the presence of  $\text{I}_3^-$ .

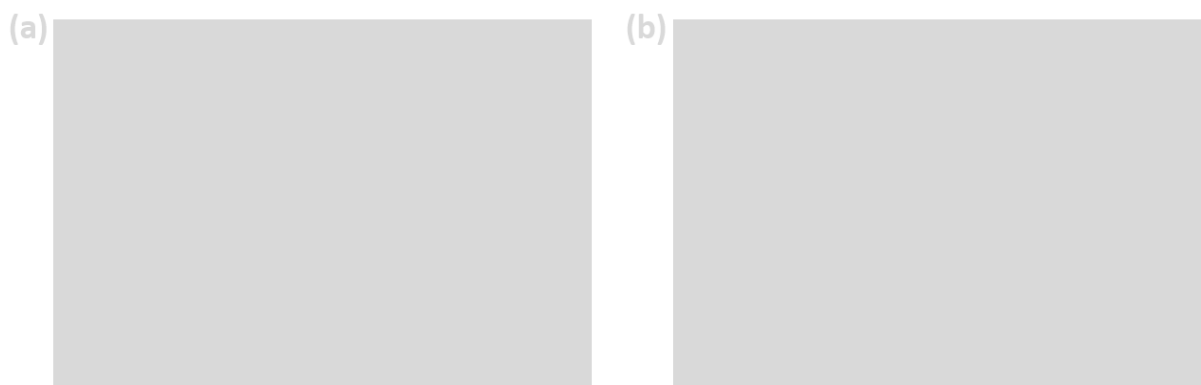

**Fig. S14** SEM images of PC cathode (a) before and (b) after 6000 cycles in 1 M  $\text{ZnSO}_4 + 0.08 \text{ M KI}$ .

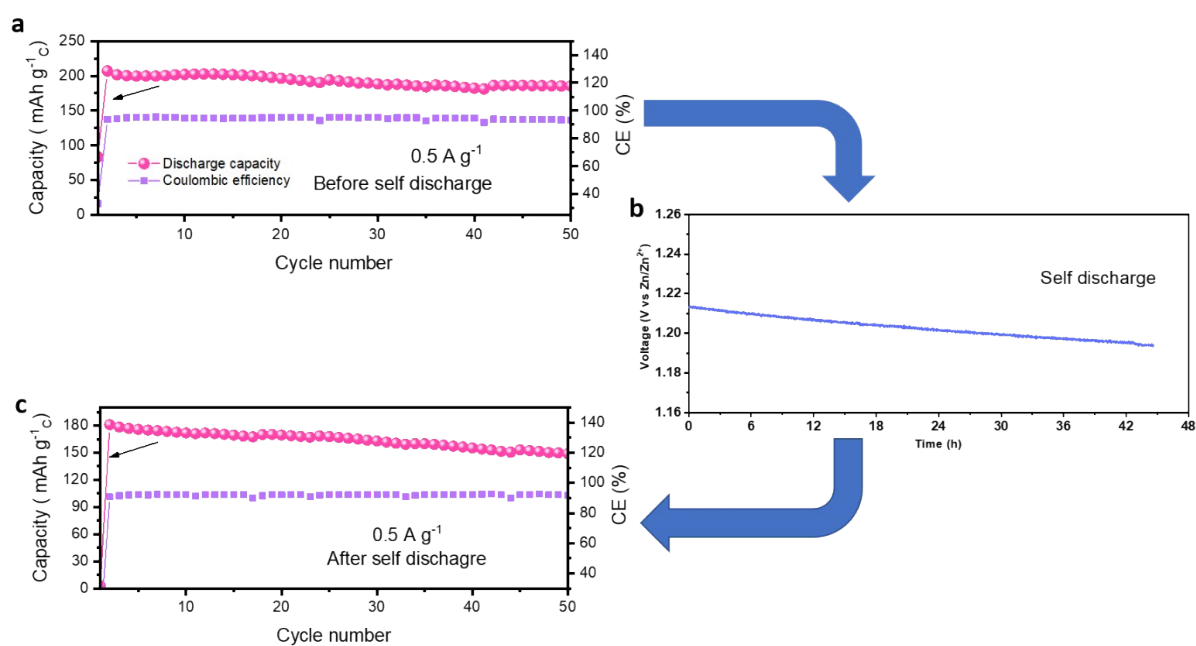

**Fig. S15** (a) Cyclic stability before self-discharge (b) self-discharge and (c) Cyclic stability after self-discharge of AZHBC in 1M ZnSO<sub>4</sub> + 0.08 M KI at 0.5 A g<sup>-1</sup>.

**Table S2** Price comparison table of KI and ZnI<sub>2</sub>.

| Chemical/ Brand  | Sigma Aldrich              | Alfa Aesar               |
|------------------|----------------------------|--------------------------|
| KI               | <b>USD. 79.14</b> (100 g)  | <b>USD. 45.76</b> (50 g) |
| ZnI <sub>2</sub> | <b>USD. 231.56</b> (100 g) | <b>USD. 84.01</b> (50 g) |

| Cathode           | Electrolyte                                                    | Current Density (A g <sup>-1</sup> ) | Specific Capacity (mAh g <sup>-1</sup> C) | Energy density (Wh kg <sup>-1</sup> ) | Ref              |
|-------------------|----------------------------------------------------------------|--------------------------------------|-------------------------------------------|---------------------------------------|------------------|
| PCN               | Aq. 1 M ZnSO <sub>4</sub>                                      | 0.2                                  | 149                                       | 119                                   | 1                |
| HPC               | Aq. 1 M ZnSO <sub>4</sub> + 1M Na <sub>2</sub> SO <sub>4</sub> | 0.2                                  | 204                                       | 118                                   | 2                |
| PSC-A600          | 1 M Zn(CF <sub>3</sub> SO <sub>3</sub> ) <sub>2</sub> in AN    | 0.2                                  | 183.7                                     | 147                                   | 3                |
| O-rich PC (PC700) | Aq. 3 M Zn(ClO <sub>4</sub> ) <sub>2</sub>                     | 0.1                                  | 179.8                                     | 104.8                                 | 4                |
| OPC               | Aq Gel. 1 M ZnSO <sub>4</sub>                                  | 0.2                                  | 137.7                                     | 82.36                                 | 5                |
| MDC               | Aq. 1 M ZnSO <sub>4</sub>                                      | 0.2                                  | -                                         | 36.4                                  | 6                |
| Ca-900            | Aq. 1 M ZnSO <sub>4</sub>                                      | 0.1                                  | ~90                                       | 75.22                                 | 7                |
| AC                | Aq. 2 M ZnSO <sub>4</sub>                                      | 0.1                                  | 121                                       | 84                                    | 8                |
| GH                | Aq. 2 M ZnSO <sub>4</sub>                                      | 0.2                                  | 99.3                                      | 76.2                                  | 9                |
| AC                | SA-Zn hydrogel                                                 | 0.2                                  | 260.5                                     | 286.6                                 | 10               |
| Kelp-carbon       | 2 M Zn(CF <sub>3</sub> SO <sub>3</sub> ) <sub>2</sub> in AN    | 0.1                                  | 196.7                                     | 111.5                                 | 11               |
| PC                | <b>Aq. 2 M ZnSO<sub>4</sub> + 0.16 KI</b>                      | <b>0.1</b>                           | <b>305.9</b>                              | <b>367.1</b>                          | <b>This work</b> |
| PC                | <b>Aq. 1 M ZnSO<sub>4</sub> + 0.08 KI</b>                      | <b>0.1</b>                           | <b>399.3</b>                              | <b>479.1</b>                          | <b>This work</b> |

**Table S3** Comparative electrochemical results of the fabricated KI redox active AZHBC with previously reported works on different zinc-based energy storage systems.

**Table S4** EDAX results of Zinc anodes before and after 6000 cycles

| (a)     |         |         | (b)     |         |         |
|---------|---------|---------|---------|---------|---------|
| Element | Weight% | Atomic% | Element | Weight% | Atomic% |
| Zn K    | 100.00  | 100.00  | O K     | 6.23    | 21.29   |
| Totals  | 100.00  |         | K K     | 0.44    | 0.61    |
|         |         |         | Zn K    | 93.34   | 78.10   |
|         |         |         | Totals  | 100.00  |         |

## References

1. Y. G. Lee, G. H. An, *ACS Appl. Mater. Interfaces*, 2020, **12**, 41342-41349.
2. P. Yu, Y. Zeng, Y. Zeng, H. Dong, H. Hu, Y. Liu, Y. Liang, *Electrochim. Acta*, 2019, **327**, 134999.
3. Z. Li, D. Chen, Y. An, C. Chen, L. Wu, Z. Chen, X. Zhang, *Energy Stor. Mater.*, 2020, **28**, 307-314.
4. J. Yin, W. Zhang, W. Wang, N. A. Alhebshi, N. Salah, H. N. Alshareef, *Adv. Energy Mater.*, 2020, **10**, 2001705.
5. Y. Zheng, W. Zhao, D. Jia, Y. Liu, L. Cui, D. Wei, R. Zheng and J. Liu, *Chem. Eng. J.*, 2020, **387**, 124161.
6. T. Xiong, Y. Shen, W. S. V. Lee, J. Xue, *Nano Materials Science*, 2020, **2**, 159-163.
7. Y. Zhang, Z. Wang, D. Li, Q. Sun, K. Lai, K. Li, L. Ci, *J. Mater. Chem. A*, 2020, **8**, 22874-22885.
8. L. Dong, X. Ma, Y. Li, L. Zhao, W. Liu, J. Cheng, F. Kang, *Energy Stor. Mater.*, 2018, **13**, 96-102.
9. Y. Zhu, X. Ye, H. Jiang, J. Xia, Z. Yue, L. Wang, X. Yao, *J. Power Sources*, 2020, **453**, 227851.
10. L. Han, H. Huang, X. Fu, J. Li, Z. Yang, X. Liu, M. Xu, *Chem. Eng. J.*, 2020, **392**, 123733.
11. J. Zeng, L. Dong, L. Sun, W. Wang, Y. Zhou, L. Wei, X. Guo, *Nano-Micro Lett*, 2021,

**13, 1-14.**
